# Supplementary material
Source: PubMed Central journal article supplement (PMC8093297)

FigS1

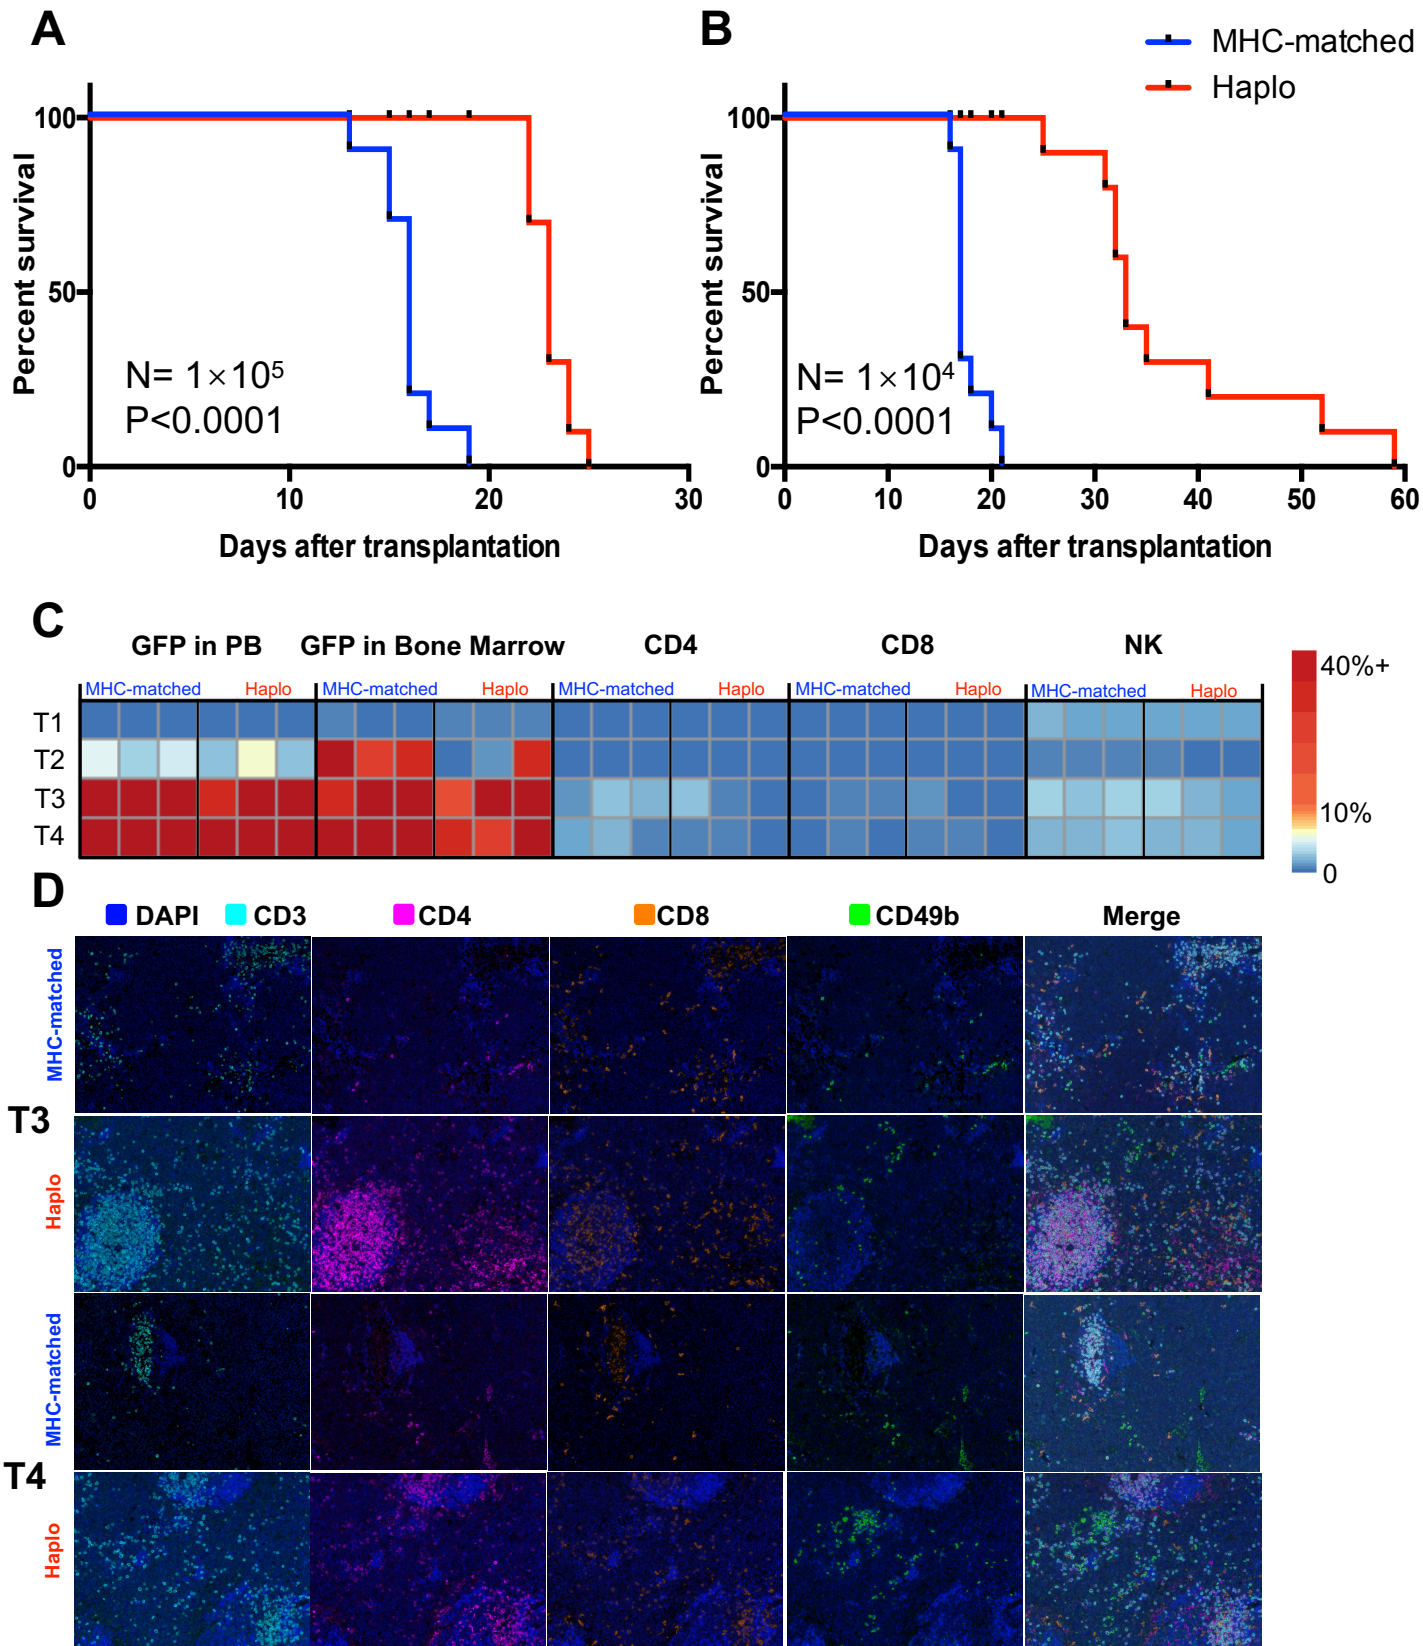

FigS2

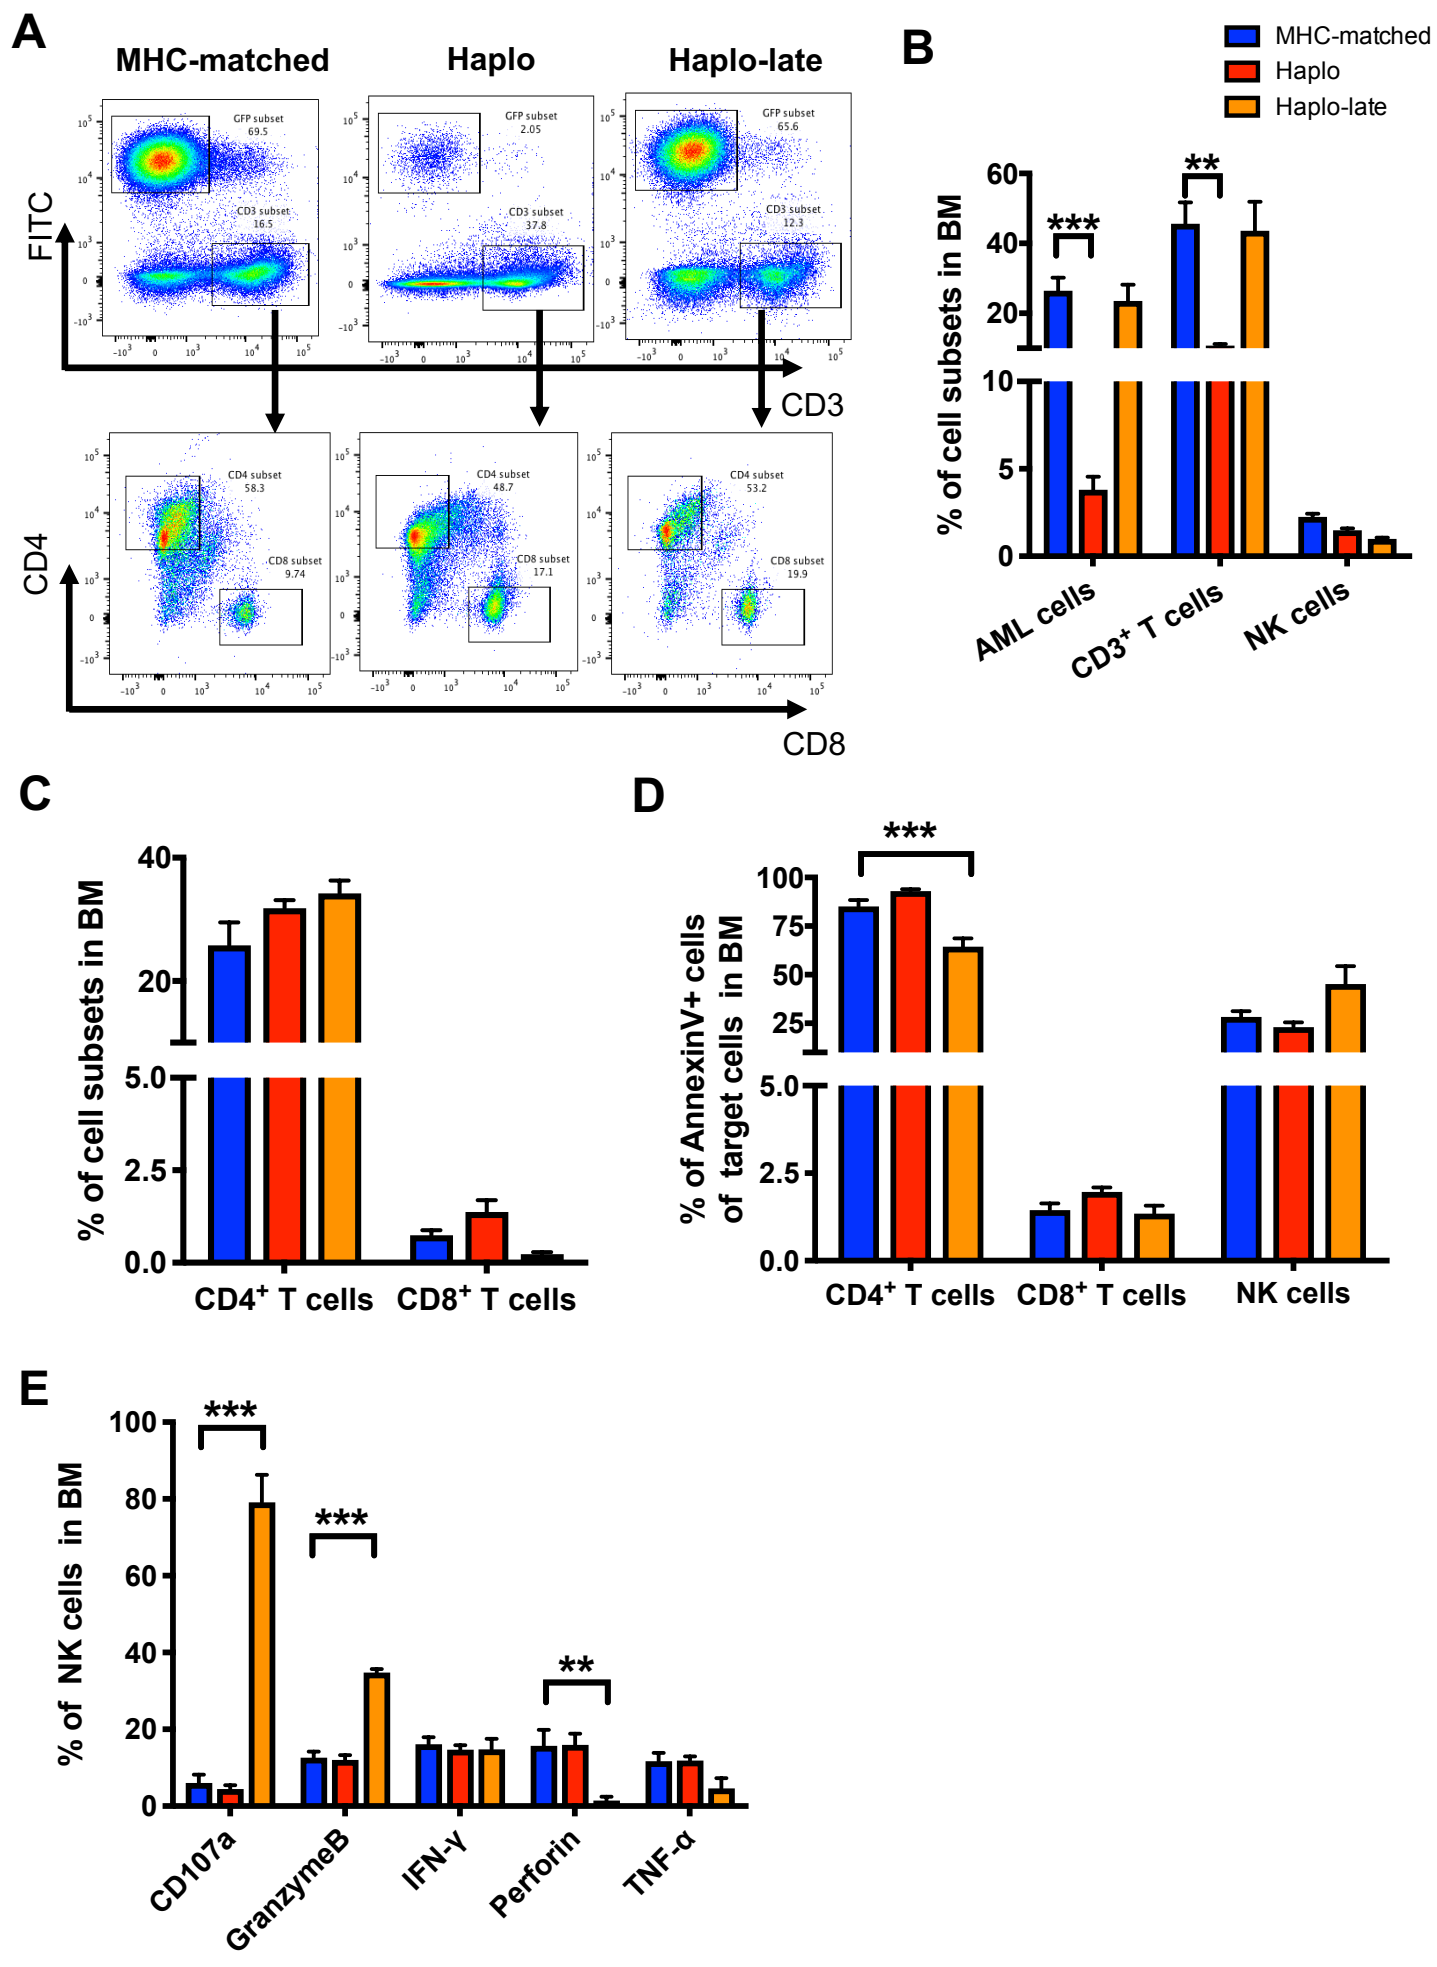

FigS3

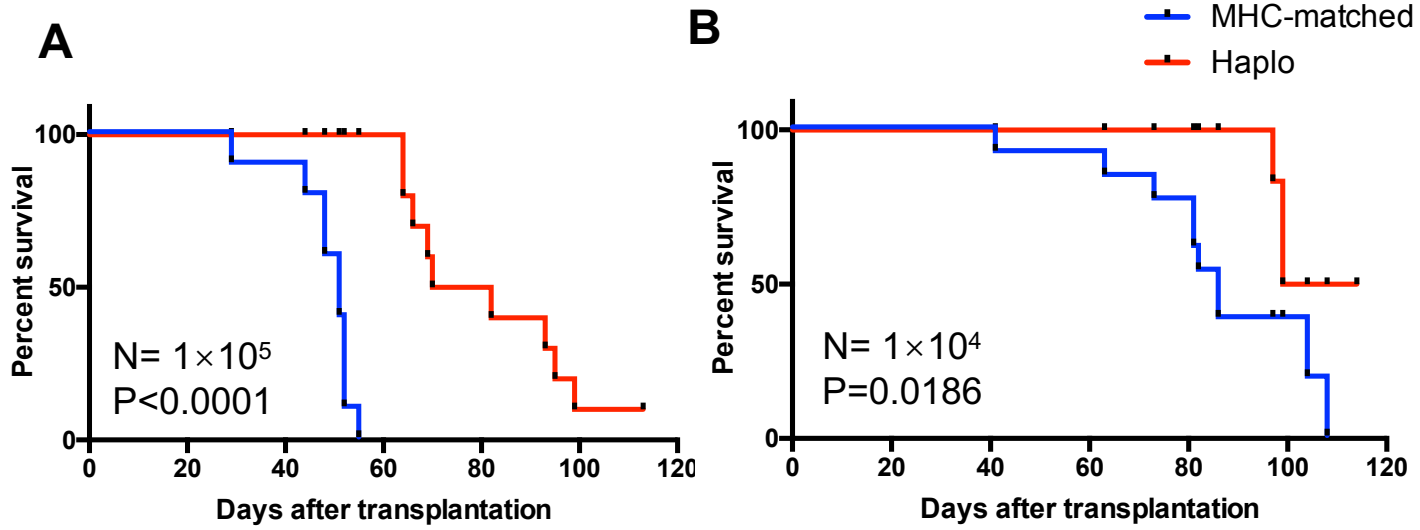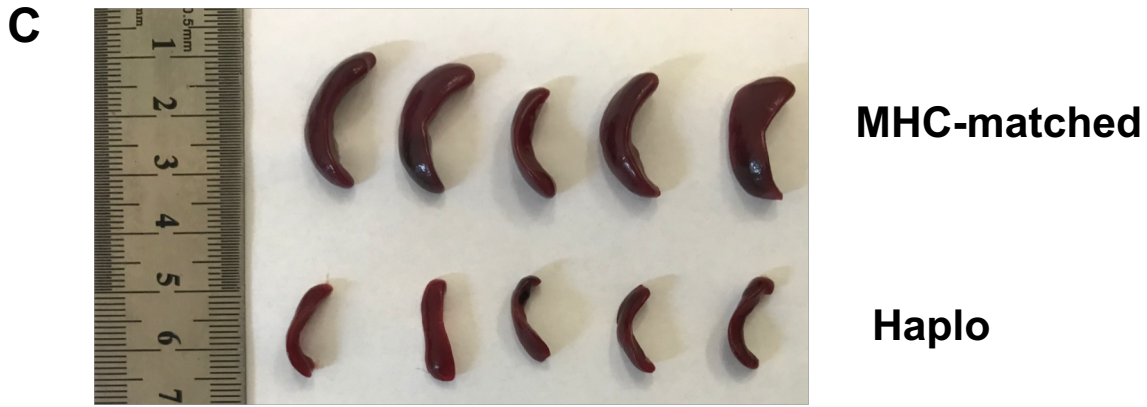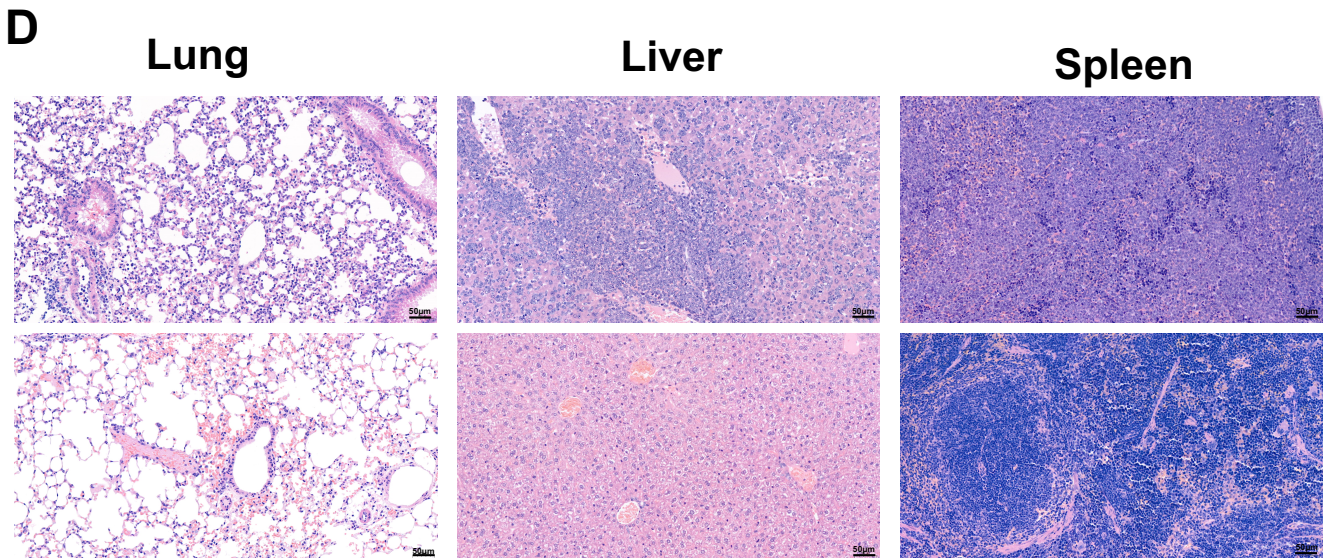

FigS4

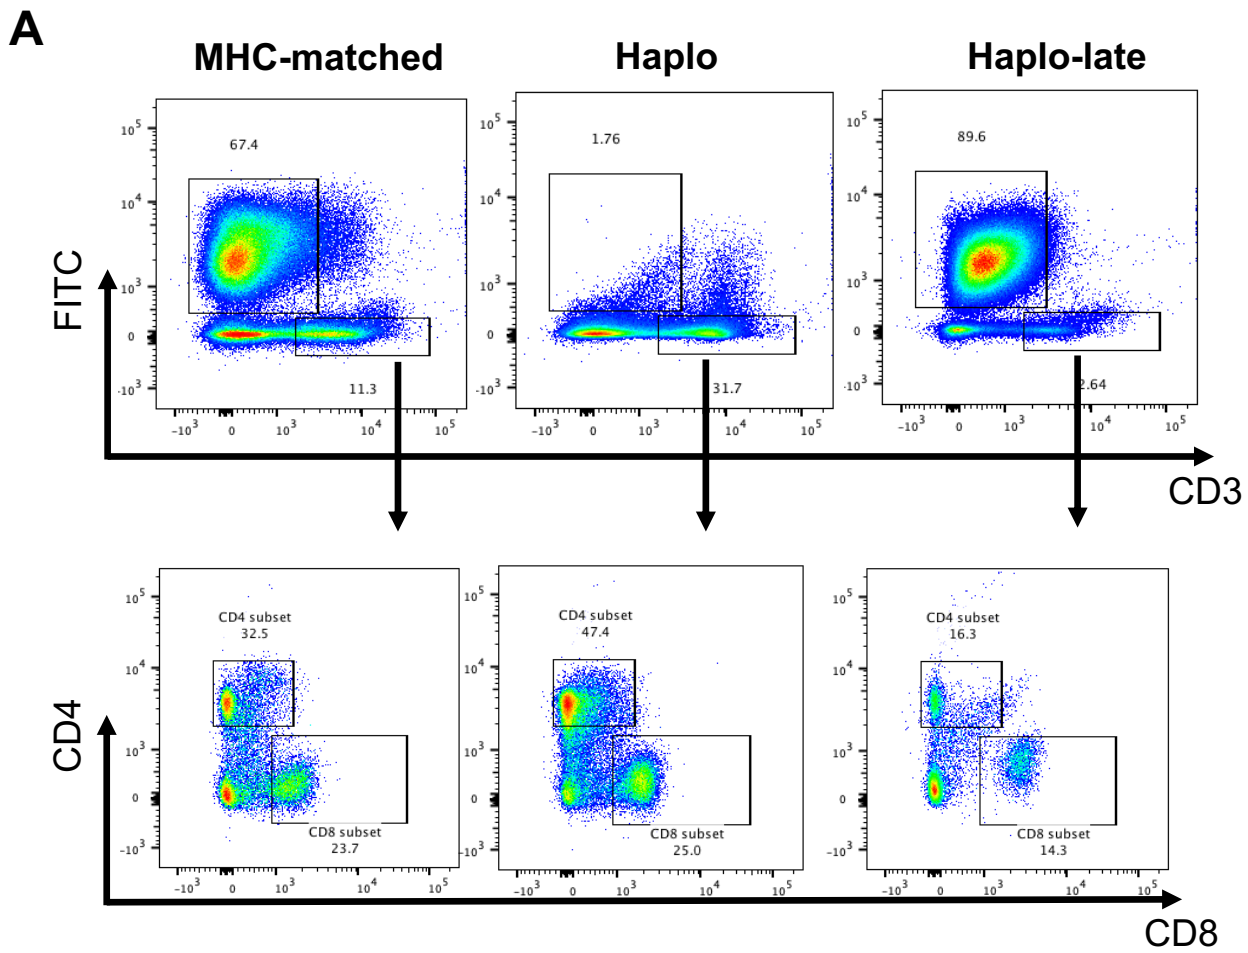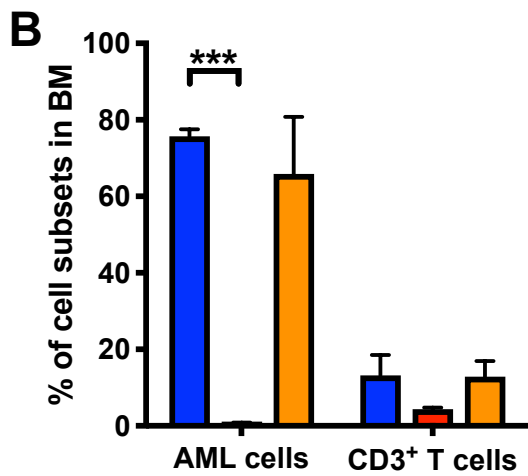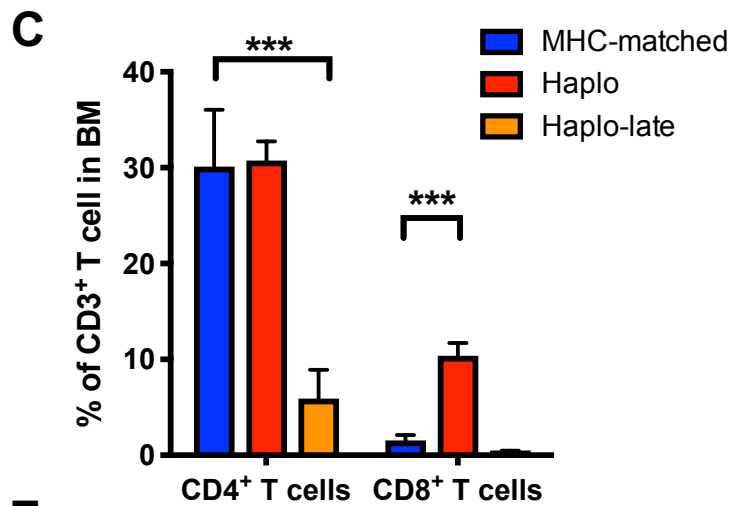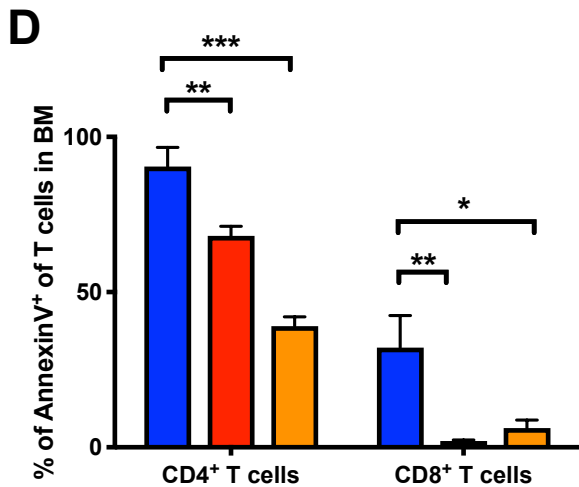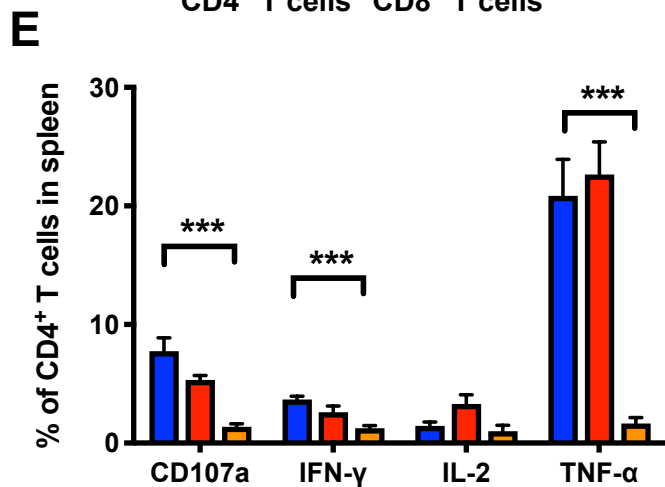

FigS5

**A**

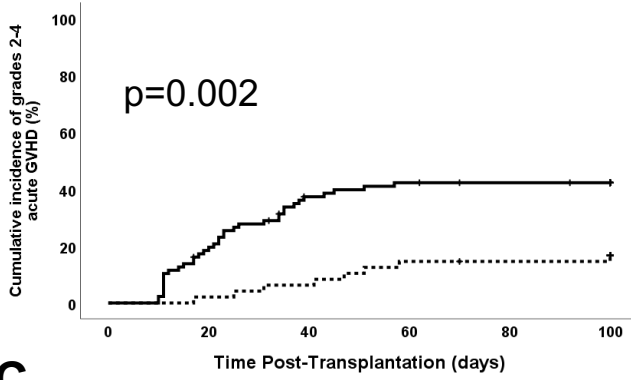

**B**

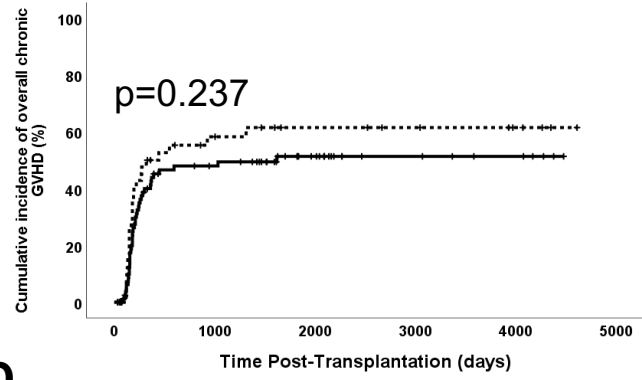

**C**

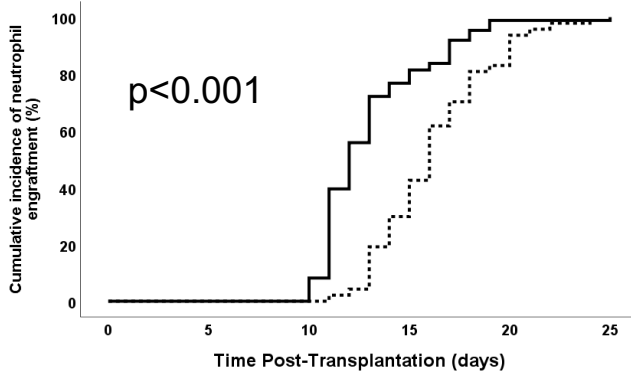

**D**

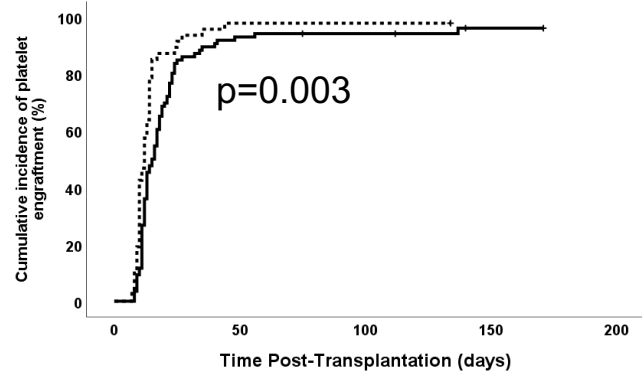

Fig S6

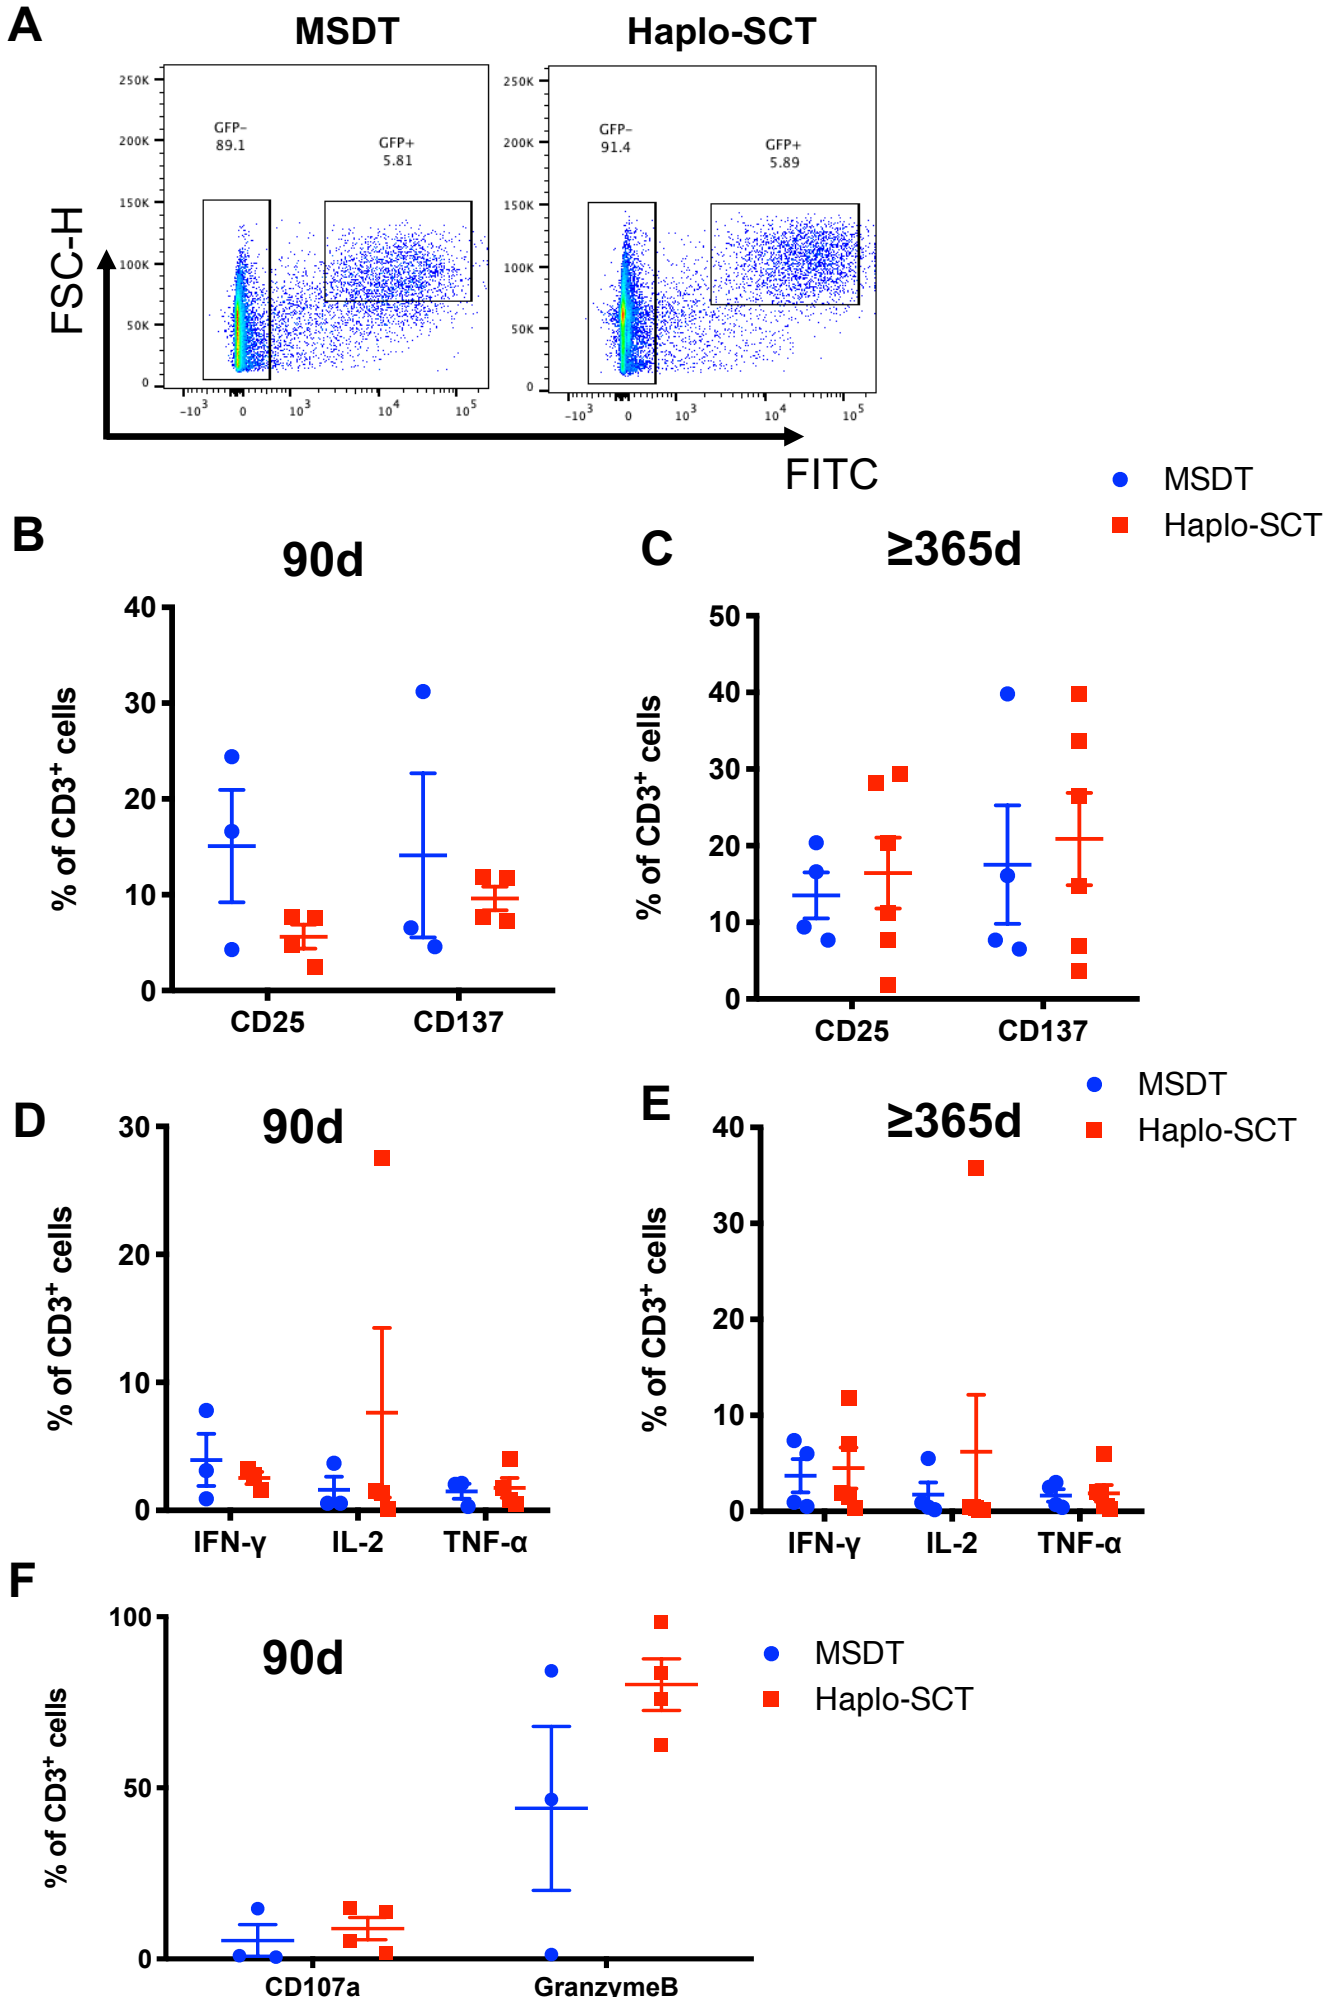

Supplement: 41423_2020_597_MOESM2_ESM.pdf [file 41423_2020_597_MOESM2_ESM.pdf]
